# Supplementary material for: Effects of Psychiatric Comorbidity in Immune-Mediated Inflammatory Disease: Protocol for a Prospective Study
Source: PubMed Central journal article supplement (PMC5792704; doi:10.2196/resprot.8794), 2018-01-17
Supplement: resprot_v7i1e15_app1.pdf [file resprot_v7i1e15_app1.pdf]

Multimedia Appendix 1. Characteristics of participants with inflammatory bowel disease (IBD) and those of participants in other IBD cohorts

| <b>Characteristic</b>        | <b>Present study</b> | <b>Bhandari[88]</b>  | <b>Ediger[89]</b>   | <b>De Groof[90]</b> |
|------------------------------|----------------------|----------------------|---------------------|---------------------|
| Data collection years        | 2014-2016            | 2009-2010            | 2003-2004           | 2004-2012           |
| Study name                   | -                    | NHANES <sup>c</sup>  | Manitoba IBD Cohort | -                   |
| Region                       | Manitoba, Canada     | United States        | Manitoba, Canada    | Netherlands         |
| N                            | 247                  | 2325226 <sup>d</sup> | 304                 | 1461                |
| <b>Age, yr</b> mean (SD)     | 47.4 (14.8)          |                      | 41 (14.06)          |                     |
| <b>Age, yr, n (%)</b>        |                      |                      |                     |                     |
| 20-50                        | 122 (49.4)           | 50%                  | e                   |                     |
| >50                          | 118 (47.8)           | 50%                  | 78 (25.6)           |                     |
| <b>Sex, n (%)</b>            |                      |                      |                     |                     |
| Male                         | 92 (37.2)            | 42%                  | 121 (39.8)          | 595 (40.7)          |
| Female                       | 155 (62.7)           | 58%                  | 183 (60.2)          | 866 (59.3)          |
| <b>Ethnicity, n (%)</b>      |                      |                      |                     |                     |
| Caucasian                    | 210 (85.4)           | 81%                  | 289 (95.1)          |                     |
| Other                        | 36 (14.6)            | 19%                  | 15 (4.9)            |                     |
| Missing                      | 1                    | 0                    | 0                   |                     |
| <b>Education, n (%)</b>      |                      |                      |                     |                     |
| <High school                 | 8 (3.2)              | 21%                  |                     |                     |
| High School/ GED             | 68 (27.5)            | 7%                   |                     |                     |
| Some College                 | 78 (31.6)            | 40%                  |                     |                     |
| ≥College/university          | 93 (37.6)            | 32%                  | 76 (25.0)           |                     |
| <b>Marital Status, n (%)</b> |                      |                      |                     |                     |
| Single/never married         | 56 (22.7)            | 19%                  | -                   |                     |

|                                                  |                          |     |                       |
|--------------------------------------------------|--------------------------|-----|-----------------------|
| Married/common law                               | 160 (64.8)               | 56% | 201 (66.1)            |
| Divorced/separated/widowed                       | 31 (12.5)                | 25% | -                     |
| <b>Ever smoked</b>                               | 138 (55.9)               | 51% |                       |
| <b>Current smoker</b>                            | 186 (19.3)               | -   |                       |
| <b>Overweight/obese</b>                          | 151 (61.1)               | 57% |                       |
| <b>Number of comorbid conditions<sup>a</sup></b> |                          |     |                       |
| 0                                                | 138 (55.9)               | 29% |                       |
| 1                                                | 73 (29.5)                | 44% |                       |
| 2                                                | 26 (10.5)                | 21% |                       |
| ≥3                                               | 10 (4.0)                 | 6%  |                       |
| Age at IBD onset, yrs mean (SD)                  | 26.6 (13.2) <sup>b</sup> |     | -                     |
| Age at IBD diagnosis, yrs mean (SD)              | 30.4 (13.4) <sup>b</sup> |     | 35.0 (25-48)          |
| <b>Type of IBD</b>                               |                          |     |                       |
| Crohn's disease                                  | 153 (61.9)               |     | 165 (54.2) 761 (52.1) |
| Ulcerative colitis                               | 94 (38.1)                |     | 143 (47.0) 579 (39.5) |
| Unspecified                                      | 0 (0)                    |     | 0 (0) 121 (8.3)       |
| <b>Montreal classification UC</b>                |                          |     |                       |
| Extent <sup>c</sup>                              |                          |     |                       |
| E1                                               | 14 (14.9)                |     | 178/749 (23.8)        |
| E2                                               | 37 (39.4)                |     | 345/749 (46.1)        |
| E3                                               | 39 (41.5)                |     | 226/749 (30.2)        |
| <b>Montreal classification CD</b>                |                          |     |                       |
| Age at diagnosis <sup>d</sup>                    |                          |     |                       |
| A1                                               | 20 (13.2)                |     | 35/571 (6.1)          |
| A2                                               | 101 (66.9)               |     | 370/571 (64.8)        |
| A3                                               | 30 (19.9)                |     | 166/571 (29.1)        |
| Localization                                     |                          |     |                       |
| L1                                               | 65 (42.5)                |     | 172/565 (30.4)        |
| L2                                               | 21 (13.7)                |     | 182/565 (32.2)        |

|           |           |                |
|-----------|-----------|----------------|
| L3        | 67 (43.8) | 205/565 (36.3) |
| L4        | 5 (3.3)   | 6/565 (1.1)    |
| Behaviour |           |                |
| B1        | 63 (41.2) | 299/555 (53.9) |
| B2        | 57 (37.2) | 119/555 (21.4) |
| B3        | 40 (26.1) | 137/555 (24.7) |

---

a- Self-reported comorbidities in present study: hypertension, diabetes, heart disease (including coronary artery disease, congestive heart failure), liver disease, kidney disease, cancer (breast, lung, colon, skin), chronic lung disease (including asthma, chronic obstructive pulmonary disease). Self-reported comorbidities in NHANES study: hypertension, diabetes, CAD, stroke, CHF, liver disease, kidney disease, asthma, cancer. b- 2 missing age at onset and 3 missing age at diagnosis. c- NHANES = National Health and Nutrition Examination Survey; sample characteristics reported only as percentages. d-NHANES using a multistage, probability sampling design to derive estimates; e-study included individuals under age 20 years, so comparable information not reported
