# Supplementary material for: Effects of Psychiatric Comorbidity in Immune-Mediated Inflammatory Disease: Protocol for a Prospective Study
Source: PubMed Central journal article supplement (PMC5792704; doi:10.2196/resprot.8794), 2018-01-17
Supplement: resprot_v7i1e15_app2.pdf [file resprot_v7i1e15_app2.pdf]

Multimedia Appendix 2. Characteristics of participants with multiple sclerosis (MS) and those of participants in other Canadian MS studies

| <b>Characteristic</b>        | <b>Present study</b> | <b>Fiest[91]</b>                             | <b>Metz[92]</b>                   | <b>Metz<sup>[92]</sup></b> |
|------------------------------|----------------------|----------------------------------------------|-----------------------------------|----------------------------|
| Data collection years        | 2014-2016            | 2010-2013                                    | 2011-2013                         | 2002-2006                  |
| Study name                   | -                    | Epidemiology and impact of comorbidity in MS | The Alberta MS Initiative (TAMSI) | Calgary Research Cohort    |
| Region                       |                      | Multi-site, Canada                           | Alberta, Canada                   | Calgary, Canada            |
| N                            | 255                  | 949                                          | 704                               | 1717                       |
| <b>Mean age (SD)</b>         | 51.1 (12.9)          | 48.6 (11.4)                                  | 47.6 (11.5)                       | 45.9 (11.1)                |
| <b>Sex, n (%)</b>            |                      |                                              |                                   |                            |
| Male                         | 47 (18.4)            | 235 (24.8)                                   | 159 (22.6)                        | 393 (22.9)                 |
| Female                       | 208 (81.6)           | 714 (75.2)                                   | 545 (77.4)                        | 1324 (77.1)                |
| <b>Ethnicity, n (%)</b>      |                      |                                              |                                   |                            |
| Caucasian                    | 217 (85.4)           | 810 (85.4)                                   | 685 (95.6)                        | 1613 (95.1)                |
| Other                        | 37 (14.5)            | 139 (14.6)                                   | 19 (4.4)                          | 104 (4.9)                  |
| <b>Education, n (%)</b>      |                      |                                              |                                   |                            |
| <High school                 | 10 (3.9)             |                                              | 32 (4.6)                          | 154 (9.1)                  |
| High School/ GED             | 78 (30.6)            | 258 (30.1) <sup>a</sup>                      | 170 (24.4)                        | 479 (28.3)                 |
| College/Technical/Trade      | 101 (39.6)           | 574 (67.1) <sup>b</sup>                      | 268 (38.5)                        | 675 (39.8)                 |
| Bachelor's degree            | 56 (22.0)            |                                              | 163 (23.4)                        | 288 (17.0)                 |
| >Bachelor's degree           | 10 (4.0)             |                                              | 64 (9.2)                          | 99 (5.8)                   |
| <b>Marital Status, n (%)</b> |                      |                                              |                                   |                            |

|                                       |             |               |             |             |
|---------------------------------------|-------------|---------------|-------------|-------------|
| Single/never married                  | 30 (11.8)   |               | 88 (12.6)   | 182 (10.6)  |
| Married/common law                    | 182 (71.4)  |               | 519 (74.0)  | 1267 (74.1) |
| Divorced/separated/widowed            | 43 (16.9)   |               | 94 (13.4)   | 260 (15.2)  |
| <b>Ever smoked, n (%)</b>             | 152 (59.6)  |               | 555 (79.3)  | 1082 (69.0) |
| <b>MS Characteristics</b>             |             |               |             |             |
| Age at MS onset, years, mean (SD)     | 31.4 (11.4) | 33.2 (10.0)   | 33.3 (10.2) | 33.0 (10.0) |
| Age at MS diagnosis, years, mean (SD) | 36.2 (11.1) | -             |             |             |
| <b>Current course, n (%)</b>          |             |               |             |             |
| Relapsing remitting                   | 184 (72.2)  | 687 (72.4)    | 444 (62.7)  |             |
| Secondary progressive                 | 48 (18.8)   | 193 (20.3)    | 116 (16.4)  |             |
| Primary progressive                   | 23 (9.0)    | 60 (6.3)      | 67 (9.5)    |             |
| Possible/uncertain                    | 0 (0)       | 0 (0)         | 81 (11.4)   |             |
| EDSS median (p25-p75)                 | 4 (3-6)     | 2.5 (1.5-5.0) |             |             |

---

a- a- high school or less; b- any post-secondary education, remaining participants reported education as other;

EDSS = Expanded Disability Status Scale
