# Supplementary material for: Effects of Psychiatric Comorbidity in Immune-Mediated Inflammatory Disease: Protocol for a Prospective Study
Source: PubMed Central journal article supplement (PMC5792704; doi:10.2196/resprot.8794), 2018-01-17
Supplement: resprot_v7i1e15_app3.pdf [file resprot_v7i1e15_app3.pdf]

Multimedia Appendix 3. Characteristics of participants with rheumatoid arthritis (RA) and those of participants in other RA cohorts

| Characteristic          | Present study       | Siebert,<br>Self-reported<br>RA[93] <sup>a</sup> | Siebert,<br>Treated RA[93] <sup>a</sup> | Dougados[94] <sup>b</sup> | Reed[95]            |
|-------------------------|---------------------|--------------------------------------------------|-----------------------------------------|---------------------------|---------------------|
| Data collection years   | 2014-2016           | 2006-2010                                        | 2006-2010                               | 2011-2012                 | 2001-2014           |
| Study name              |                     | United Kingdom<br>Biobank                        | United Kingdom<br>Biobank               | COMORA                    | Corrona<br>registry |
| Region                  | Manitoba,<br>Canada | United Kingdom                                   | United Kingdom                          | 17 countries              | United<br>States    |
| N                       | 154                 | 5657                                             | 2849                                    | 3920                      | 29853               |
| <b>Age, yr</b>          |                     |                                                  |                                         |                           |                     |
| Mean (SD)               | 59.5 (11.7)         | -                                                | -                                       | 56 (13) (48-63)           | 57.9 (13.4)         |
| Median (p25-p75)        |                     | -                                                | -                                       |                           | -                   |
| <b>Sex, n (%)</b>       |                     |                                                  |                                         |                           |                     |
| Male                    | 24 (15.6)           | 1706 (30.2)                                      | -                                       | 18.3% (9-33)              | 14660<br>(23.7)     |
| Female                  | 130 (84.4)          | 3951 (69.8)                                      | -                                       | 81.7% (66-91)             | 15193<br>(76.3)     |
| <b>Ethnicity, n (%)</b> |                     |                                                  |                                         |                           |                     |
| Caucasian               | 114 (74.5)          | 5327 (96.1)                                      | 2716 (97.0)                             | -                         | -                   |
| Other                   | 39 (25.5)           | 214 (3.9)                                        | 84 (3.0)                                | -                         | -                   |
| Missing                 | 1                   | 116                                              | 49                                      | -                         |                     |
| <b>Education, n (%)</b> |                     |                                                  |                                         |                           |                     |
| <High school            | 14 (9.0)            |                                                  |                                         |                           |                     |

|                                             |             |             |             |                           |
|---------------------------------------------|-------------|-------------|-------------|---------------------------|
| High School/ GED                            | 37 (24.0)   |             |             |                           |
| College                                     | 45 (29.2)   |             |             |                           |
| Technical/Trade                             | 19 (12.3)   |             |             |                           |
| Bachelor degree                             | 39 (25.3)   |             |             | 24.5% (5.3-75)            |
| <b>Marital Status, n (%)</b>                |             |             |             |                           |
| Single/never married                        | 20 (13.0)   |             |             |                           |
| Married/common law                          | 93 (60.4)   |             |             | 69.7% (50-86)             |
| Divorced/separated/widowed                  | 41 (26.6)   |             |             |                           |
| <b>Lipid/hypertensive treatment, n (%)</b>  | 61 (39.6)   | 4228 (75.2) | 2103 (73.8) |                           |
| <b>Smoking status, n (%)</b>                |             |             |             |                           |
| Current                                     | 22 (14.3)   | 711 (12.7)  | 326 (11.5)  | 13.2% (0.9-48)            |
| Past                                        | 73 (47.4)   | 2850 (50.8) | 1493 (52.8) |                           |
| Never                                       | 59 (38.3)   | 2045 (36.5) | 1008 (35.6) |                           |
| Missing                                     | 0           | 51          | 22          |                           |
| <b>Overweight/obese, n (%)</b>              | 101 (65.5)  |             |             | 50.7% (0-69) <sup>c</sup> |
| <b>Rheumatoid arthritis characteristics</b> |             |             |             |                           |
| Age at RA onset (self-reported), mean (SD)  | 39.5 (14.8) |             |             |                           |
| Age at RA diagnosis, mean (SD)              | 41.5 (15.0) |             |             |                           |
| Swollen joints, mean (SD)                   | 1.3 (2.5)   |             |             | 4.5 (5.6)                 |
| Tender joints, mean (SD)                    | 4.7 (6.9)   |             |             | 4.6 (6.2)                 |

|                                             |             |            |                         |                             |
|---------------------------------------------|-------------|------------|-------------------------|-----------------------------|
| mHAQ, mean (SD)                             | 0.52 (0.51) |            |                         |                             |
| HAQ, mean (SD)                              |             |            | 1.0 (0.7) (0.7-<br>1.5) |                             |
| Disease-modifying<br>antirheumatic drug use | 135 (87.7)  | 2849 (100) | 43% (last 5<br>years)   | 9411<br>(47.0) <sup>d</sup> |

---

a- This study reported characteristics of all persons enrolled with self-reported RA, as well as the subcohort taking disease-modifying anti-rheumatic therapies; b- This study reported average percentages across all sites, and range of lowest and highest values in parentheses; c-highest frequency of overweight/obesity observed in the USA; d-history of biologic disease-modifying anti-rheumatic drug use mHAQ = modified Health Assessment Questionnaire, HAQ = Health Assessment Questionnaire
