# Supplementary material for: Effects of Psychiatric Comorbidity in Immune-Mediated Inflammatory Disease: Protocol for a Prospective Study
Source: PubMed Central journal article supplement (PMC5792704; doi:10.2196/resprot.8794), 2018-01-17
Supplement: resprot_v7i1e15_app4.pdf [file resprot_v7i1e15_app4.pdf]

Multimedia Appendix 4. Characteristics of participants with depression or anxiety disorder and those of participants in other depression/anxiety disorder cohorts

| <b>Characteristic</b>   | <b>Present study</b> | <b>2012 Canadian Community Health Survey: Mental Health<sup>a</sup></b> |
|-------------------------|----------------------|-------------------------------------------------------------------------|
| Data collection years   | 2014-2016            | 2012                                                                    |
| Study name              | -                    | CCHS-MH                                                                 |
| Region                  | Manitoba, Canada     | Canada                                                                  |
| N                       | 308                  | 2812                                                                    |
| <b>Age, yr</b>          |                      |                                                                         |
| 18-34                   | 92 (29.9)            | 30.9% <sup>b</sup>                                                      |
| 35-49                   | 106 (34.4)           | 28.6%                                                                   |
| 50-64                   | 100 (32.5)           | 28.6%                                                                   |
| 65-74                   | 6 (1.9)              | 8.7%                                                                    |
| ≥75                     | 4 (1.3)              | 3.2%                                                                    |
| <b>Sex, n (%)</b>       |                      |                                                                         |
| Male                    | 72 (23.5)            | 37.0%                                                                   |
| Female                  | 235 (76.6)           | 63.0%                                                                   |
| <b>Ethnicity, n (%)</b> |                      |                                                                         |
| Caucasian               | 245 (79.8)           | 85.0%                                                                   |
| Other                   | 62 (20.2)            | 15.0%                                                                   |
| Missing                 | 1                    |                                                                         |
| <b>Education, n (%)</b> |                      |                                                                         |
| <High school            | 17 (5.5)             | 19.5%                                                                   |
| High school/ GED        | 85 (27.6)            | 15.3%                                                                   |
| >High school            | 206 (66.9)           | 65.1%                                                                   |

|                                   |            |                    |
|-----------------------------------|------------|--------------------|
| <b>Marital Status, n (%)</b>      |            |                    |
| Single/never married              | 111 (36.0) | 30.7%              |
| Married/common law                | 134 (43.5) | 40.8%              |
| Divorced/separated/widowed        | 63 (20.5)  | 28.6%              |
| <b>Smoking status, n (%)</b>      |            |                    |
| Current                           | 65 (21.1)  | 30.8% <sup>c</sup> |
| Past                              | 88 (23.6)  | 38.6%              |
| Never                             | 153 (49.7) | 30.6%              |
| <b>Body mass index, n (%)</b>     |            |                    |
| <20                               | 21 (6.9)   | 6.2%               |
| 20- <25                           | 73 (23.8)  | 33.5%              |
| 25- <30                           | 82 (26.9)  | 31.2%              |
| 30 - <35                          | 56 (18.4)  | 18.4%              |
| ≥35                               | 73 (23.8)  | 10.8%              |
| <b>Comorbid conditions, n (%)</b> |            |                    |
| Heart disease                     | 13 (4.2)   | 5.7%               |
| Diabetes                          | 21 (6.8)   | 9.1%               |
| Hypertension                      | 62 (20.1)  | 18.7%              |
| Lung disease                      | 74 (24.0)  | -- <sup>d</sup>    |

---

a- Weighted proportions from the Statistics Canada public use microdata file (PUMF) based on n=2812 (weighted proportion = 9.5%) of respondents reporting a professional diagnosis of a mood or anxiety disorder; b-Age 15-34 rather than 18-34 due to the coding of age groups in the CCHS-MH public use datafile; c-Includes both current daily and occasional smokers; d- Not assessed in the CCHS-MH survey
